# Supplementary material
Source: Springer Nature journal article supplement (https://www.springermedizin.de/resource/supplementary/13023_2013_628_MOESM6_ESM.pdf/9642548)

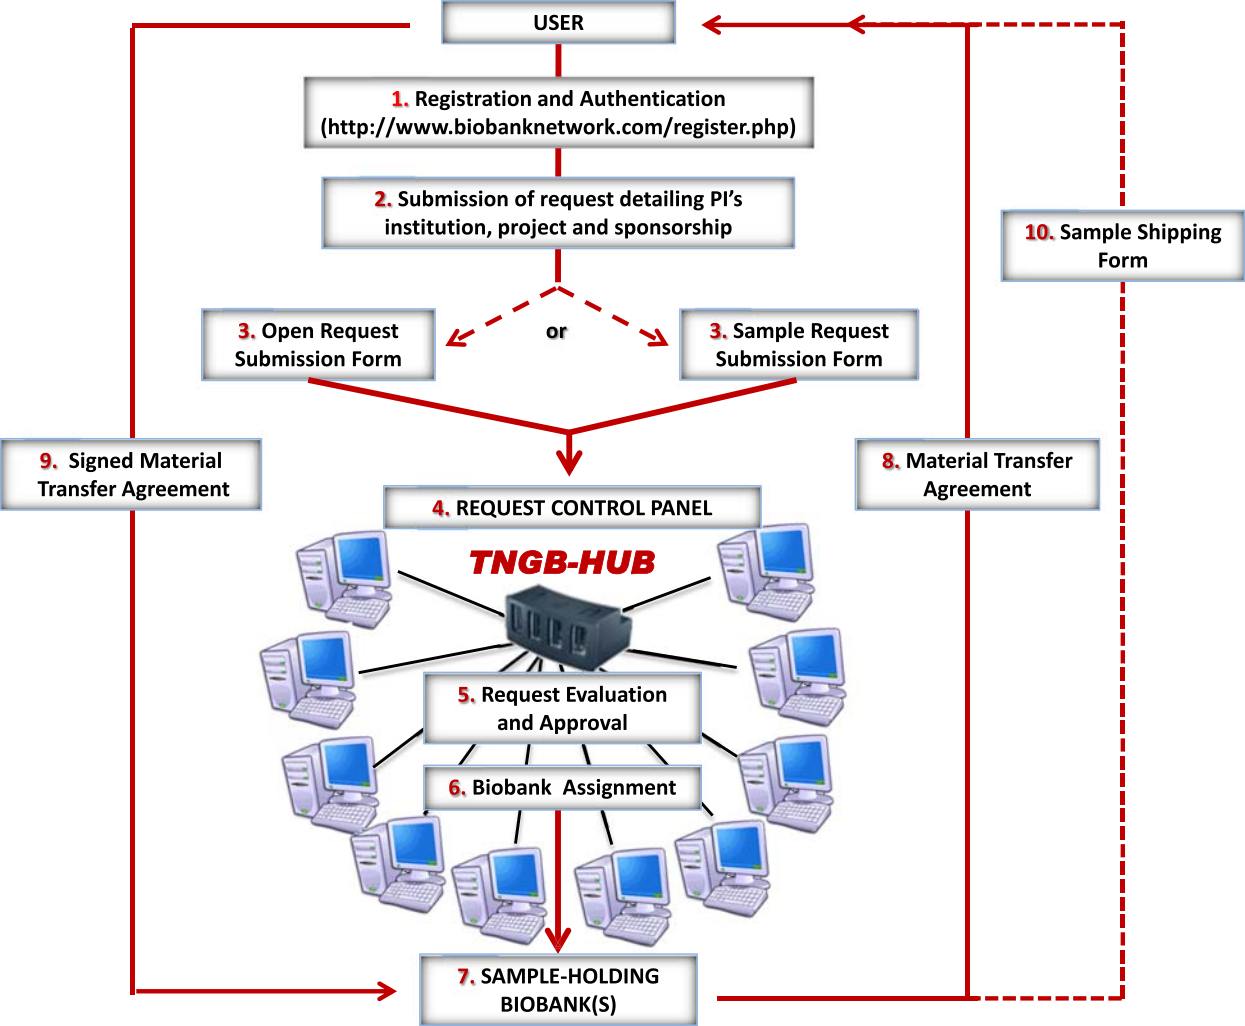

Supplement: MOESM6 [file 9642548]
